# Supplementary material for: One-pot synthesis of PtIr tripods with a dendritic surface as an efficient catalyst for the oxygen reduction reaction
Source: Royal Society of Chemistry journal article supplement (doi:10.1039/c7ta00533d), 2017-01-01
Supplement: c7ta00533d1.pdf [file c7ta00533d1.pdf]

## Supporting information

### One-Pot Synthesis of PtIr Tripods with Dendritic Surface as Efficient Catalyst for Oxygen Reduction Reaction

Shuanglong Lu,<sup>\*a</sup> Kamel Eid,<sup>\*b</sup> Yaoyao Deng,<sup>a</sup> Jun Guo,<sup>c</sup> Liang Wang,<sup>b</sup> Hongjing Wang,<sup>\*b</sup> Hongwei Gu<sup>\*a</sup>

<sup>a</sup> Key Laboratory of Organic Synthesis of Jiangsu Province, College of Chemistry, Chemical Engineering and Materials Science & Collaborative Innovation Centre of Suzhou Nano Science and Technology, Soochow University, Suzhou 215123, P.R. China. E-mail: hongwei@suda.edu.cn

<sup>b</sup> College of Chemical Engineering, Zhejiang University of Technology, Hangzhou, Zhejiang 310014, P.R. China. E-mail: hjw@zjut.edu.cn

<sup>c</sup> Analysis and Testing Centre, Soochow University, Suzhou 215123, P.R. China

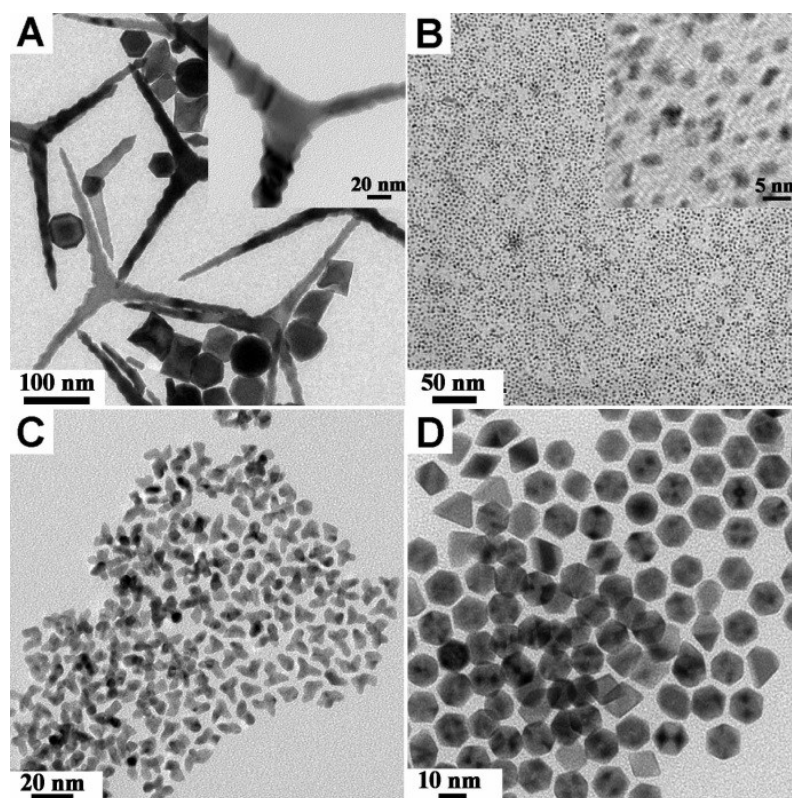

**Figure S1.** (A) TEM image of monometallic Pt NCs and (B) Ir NCs prepared under typical synthetic parameters, the inset in them are magnified TEM images. (C) PtIr NCs and (D) Pt NCs synthesized under the N<sub>2</sub> atmosphere.

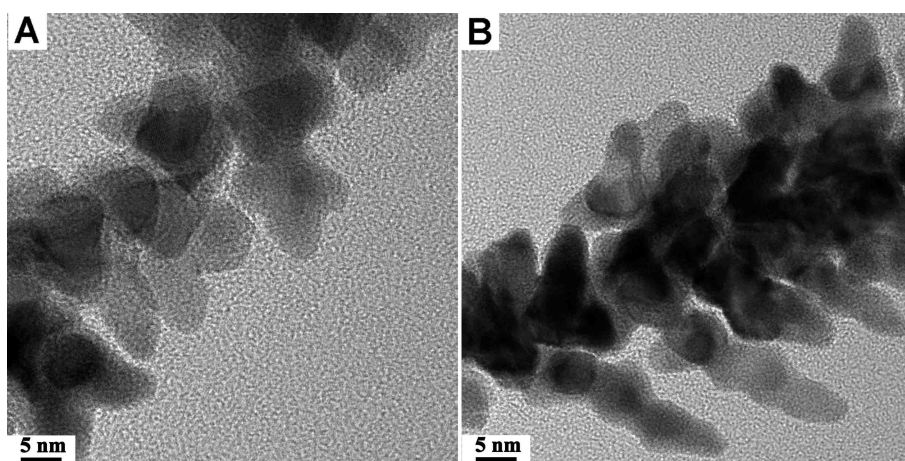

**Figure S2.** HR-TEM images of the branches of the PtIr DTPs at early stage and mature stage.

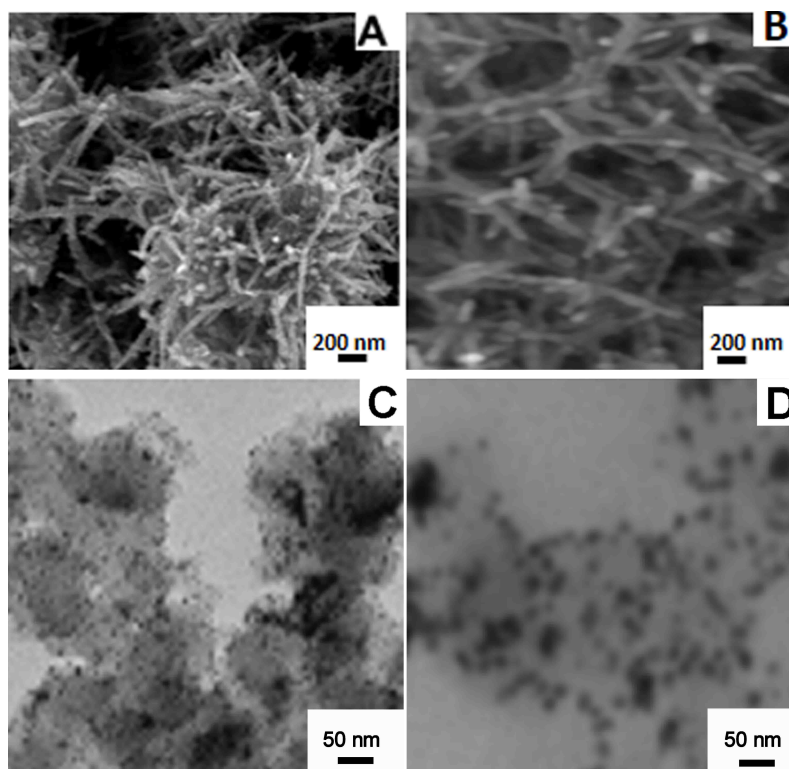

**Figure S3.** (A-B) SEM images of PtIr DTPs before and after durability test.(C-D) TEM images of Pt/C catalysts before and after durability test.
